# Supplementary material for: Intrinsic Repeated Self-Healing Textiles: Developing Electrospun Fabrics for Enhanced Durability and Stretchability
Source: PubMed Central journal article supplement (PMC11696384; doi:10.1021/acsomega.4c09296), 2024-12-16
Supplement: ao4c09296_si_001.pdf [file ao4c09296_si_001.pdf]

# Supporting Information

## **Intrinsic Repeated Self-Healing Textiles: Developing Electrospun Fabrics for Enhanced Durability and Stretchability**

Tse-Yu Lo,<sup>1</sup> Heng-Hsuan Su,<sup>1</sup> Jih-Hao Ho,<sup>1,2</sup> Chia-Wei Chang,<sup>1</sup> Huan-Ru Chen,<sup>1</sup> Hsun-Hao Hsu,<sup>1</sup> Kai-Jie Chang,<sup>1</sup> and Jiun-Tai Chen<sup>1,3\*</sup>

<sup>1</sup>Department of Applied Chemistry, National Yang Ming Chiao Tung University, Hsinchu, Taiwan 300093

<sup>2</sup>Department of Chemistry, Duke University, Durham, NC, 27708, United States

<sup>3</sup>Center for Emergent Functional Matter Science, National Yang Ming Chiao Tung University, Hsinchu, Taiwan 300093

\*To whom correspondence should be addressed. E-mail: [jtchen@nycu.edu.tw](mailto:jtchen@nycu.edu.tw).

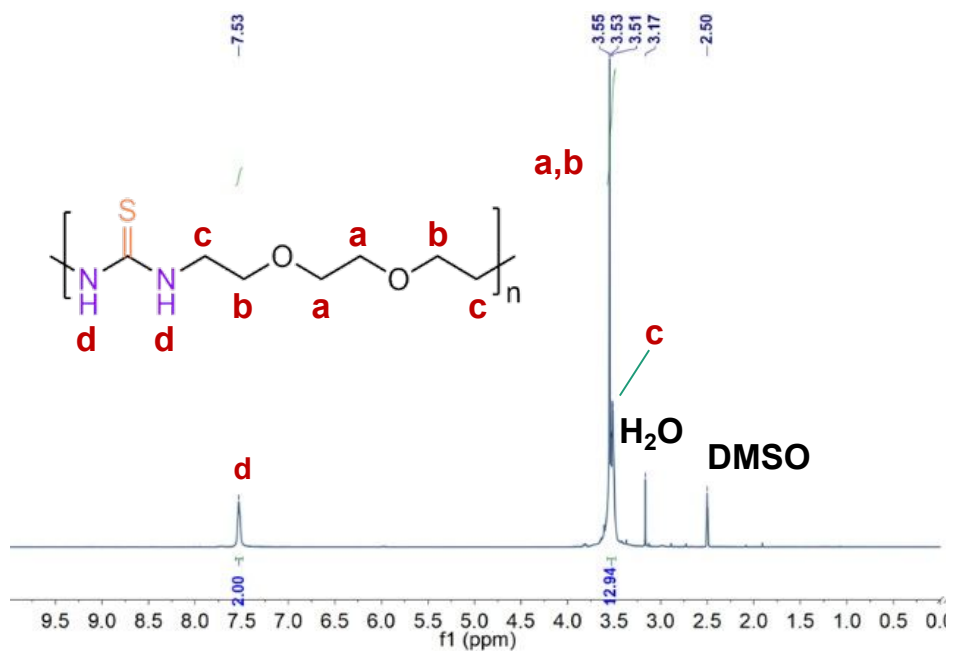

Figure S1.  $^1\text{H-NMR}$  spectrum of PTUEG<sub>3</sub>.

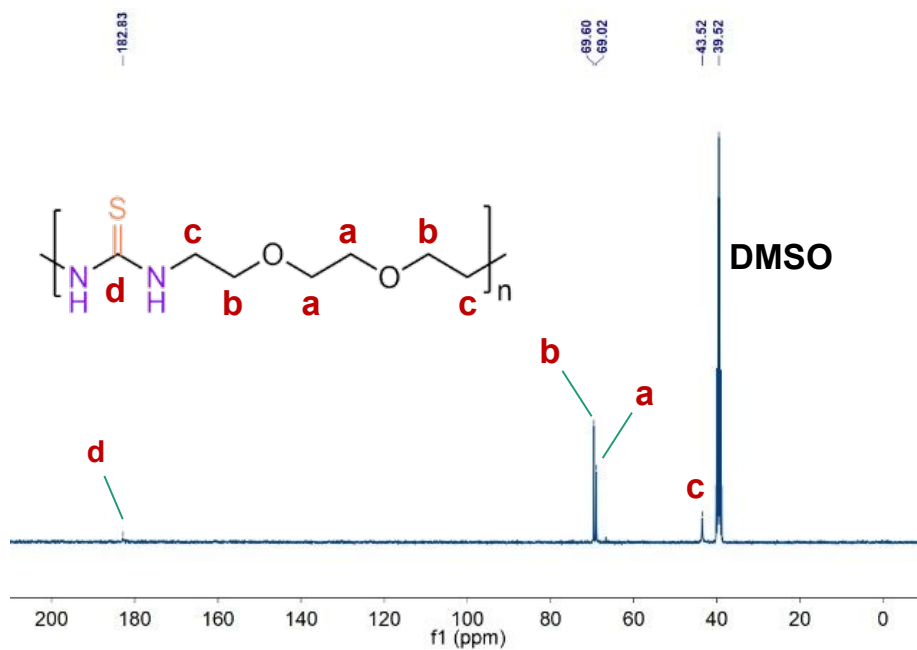

Figure S2.  $^{13}\text{C-NMR}$  spectrum of PTUEG<sub>3</sub>.

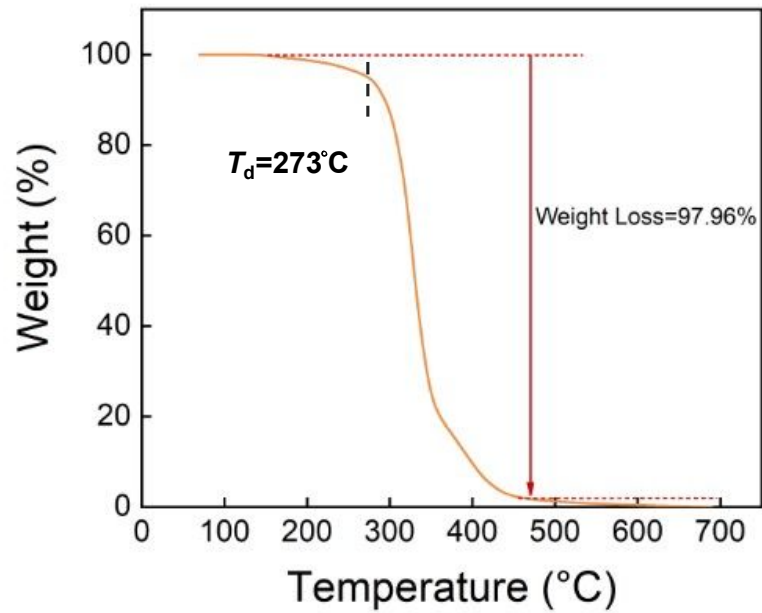

**Figure S3.** TGA curve of PTUEG<sub>3</sub>.

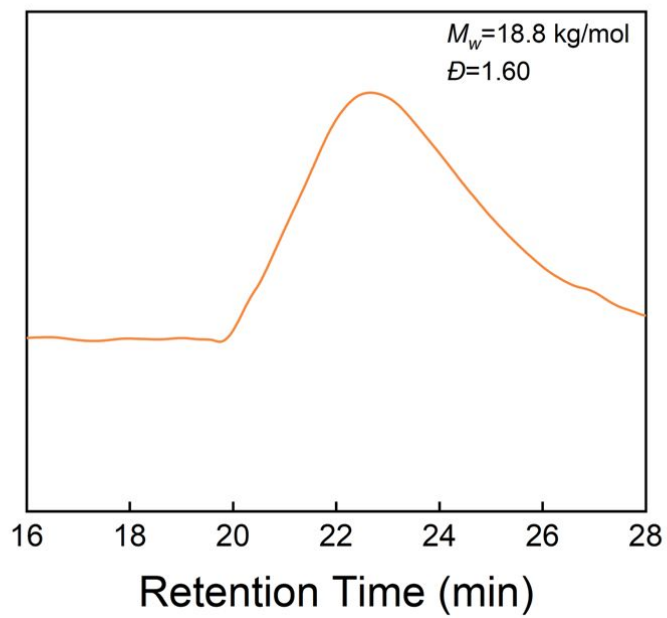

**Figure S4.** The GPC curve of PTUEG<sub>3</sub> from entry 3 in Table 1.

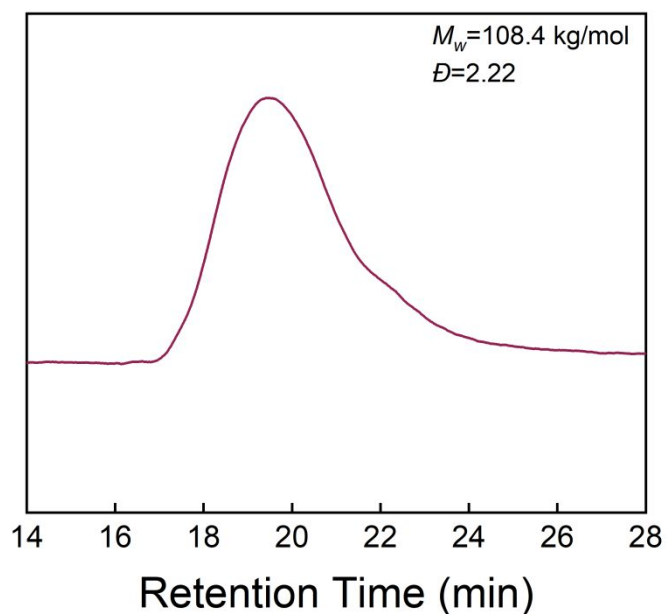

**Figure S5.** The GPC curve of TPU.

**Table S1.** Density of the TPU/PTUEG<sub>3</sub> fabrics

| PTUEG <sub>3</sub> Ratio (%) | Weight (mg) | Thickness (mm) | Volume (cm <sup>3</sup> ) | Density (g/cm <sup>3</sup> ) |
|------------------------------|-------------|----------------|---------------------------|------------------------------|
| 50                           | 20.5        | 0.062          | 0.019                     | 1.102                        |
|                              | 19.8        | 0.065          | 0.020                     | 1.015                        |
|                              | 20.1        | 0.064          | 0.019                     | 1.047                        |
| 70                           | 21.8        | 0.069          | 0.021                     | 1.053                        |
|                              | 22.8        | 0.071          | 0.021                     | 1.070                        |
|                              | 24.5        | 0.074          | 0.011                     | 1.104                        |

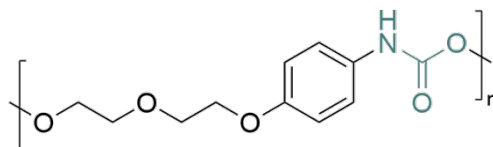

**Figure S6.** The soft segment structure of the TPU.

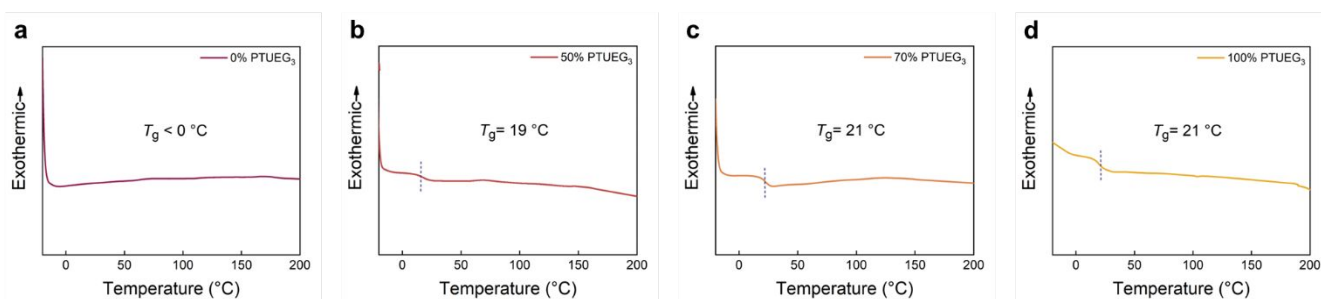

**Figure S7.** (a–d) DSC thermograms of TPU/PTUEG<sub>3</sub> fabrics with different TPU/PTUEG<sub>3</sub> weight ratios (100:0, 50:50, 30: 70, and 0:100 ).

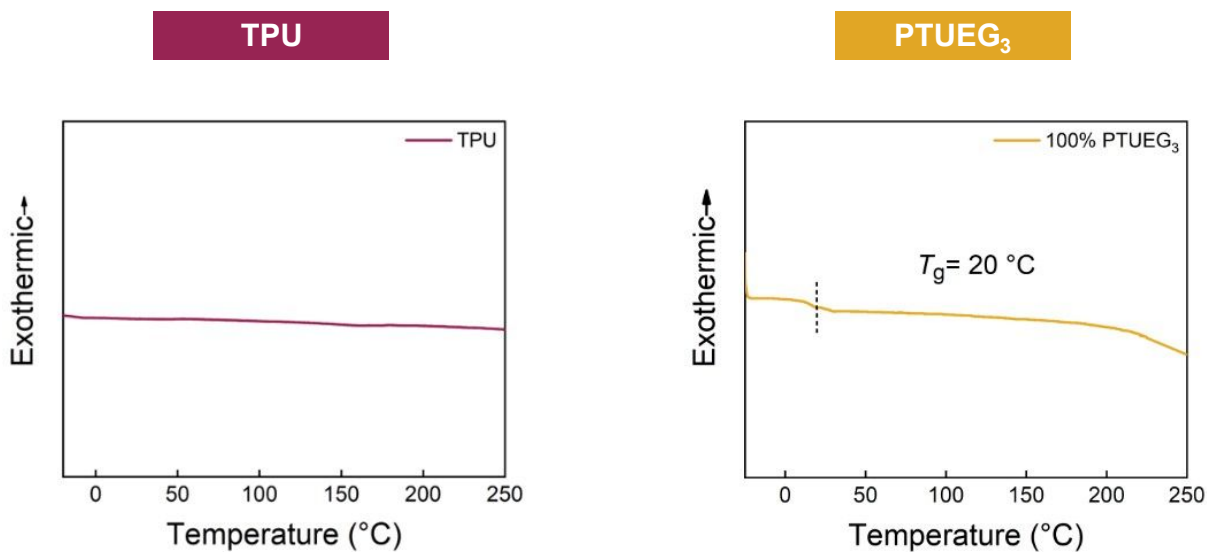

**Figure S8.** DSC thermograms of TPU and PTUEG<sub>3</sub> fabrics with slower scanning speed of 2.5 °C min<sup>-1</sup>.

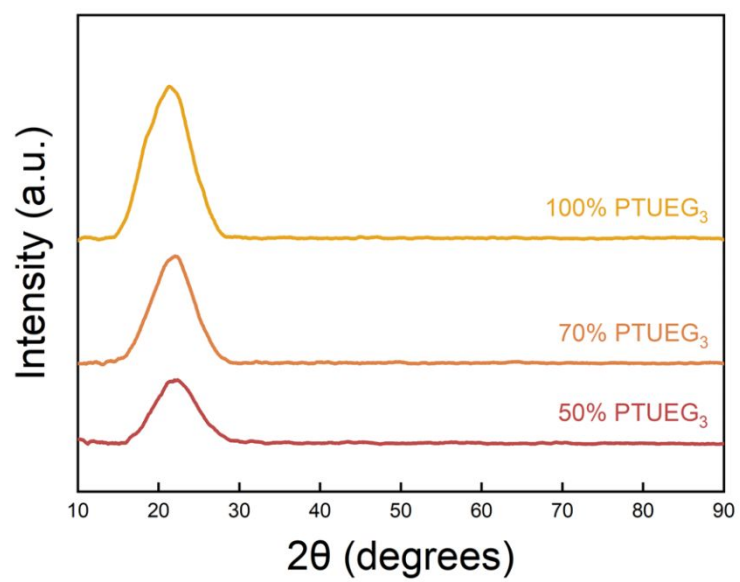

**Figure S9.** XRD profiles of 50, 70, and 100% PTUEG<sub>3</sub>.

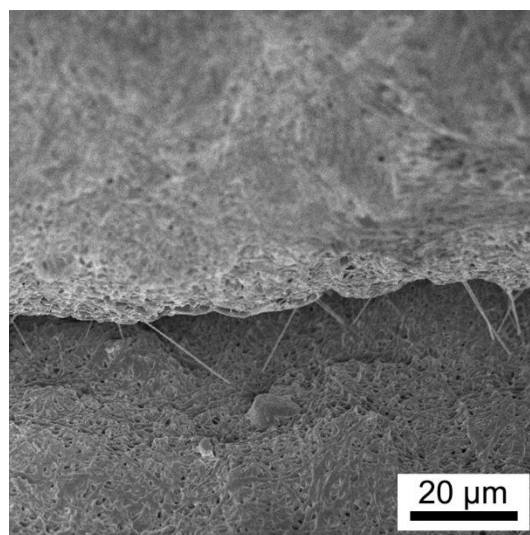

**Figure S10.** SEM image of overlap region after healing.

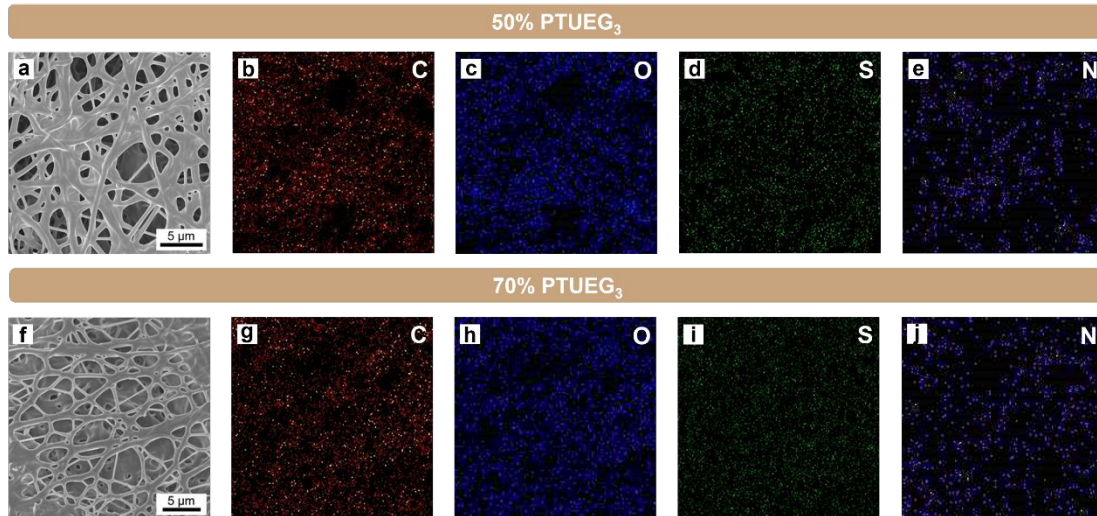

**Figure S11.** EDS mapping analysis of the elemental compositions in the 50% and 70% TPU/PTUEG<sub>3</sub> fabrics. (a, f) SEM images of the fibers. (b–e, g–j) Elemental mapping of C, O, S, and N corresponding to (a, f).

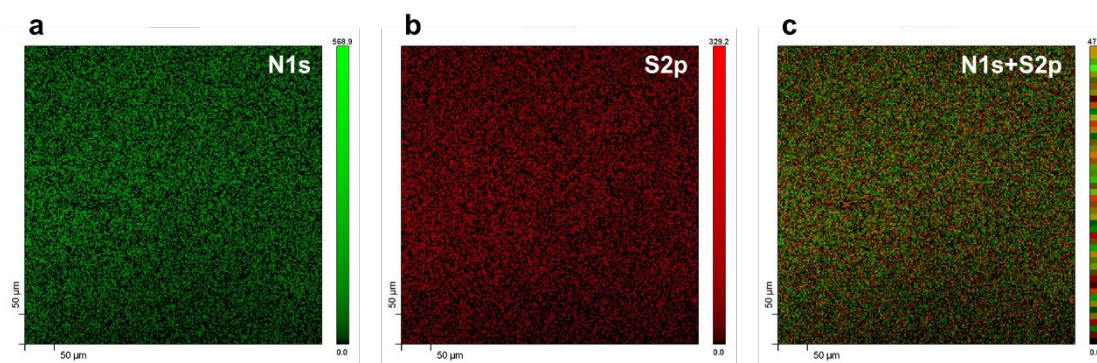

**Figure S12.** XPS mapping analysis of the elemental compositions in the TPU/PTUEG<sub>3</sub> fabrics. (a–c) Nitrogen (N1s), sulfur (S2p), and combined mapping of N1s and S2p.

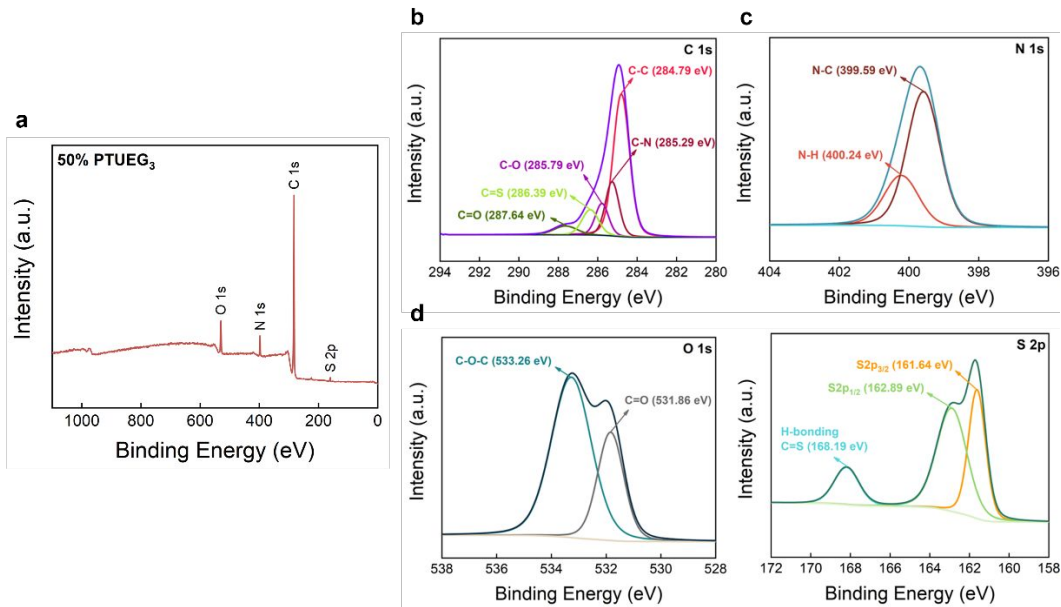

**Figure S13.** XPS spectra of the elemental compositions in the TPU/PTUEG<sub>3</sub> fabrics with a 50:50 weight ratio. (a) Full survey spectrum. (b–e) C1s, N1s, O1s, and S2p spectra.

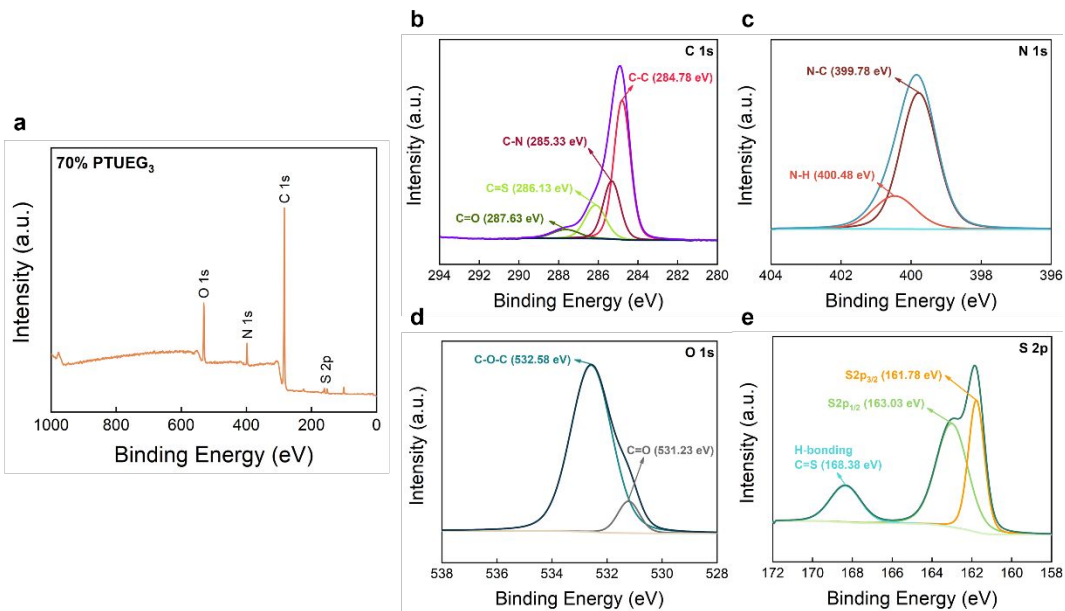

**Figure S14.** XPS spectra of the elemental compositions in the TPU/PTUEG<sub>3</sub> fabrics with a 30:70 weight ratio. (a) Full survey spectrum. (b–e) C1s, N1s, O1s, and S2p spectra.



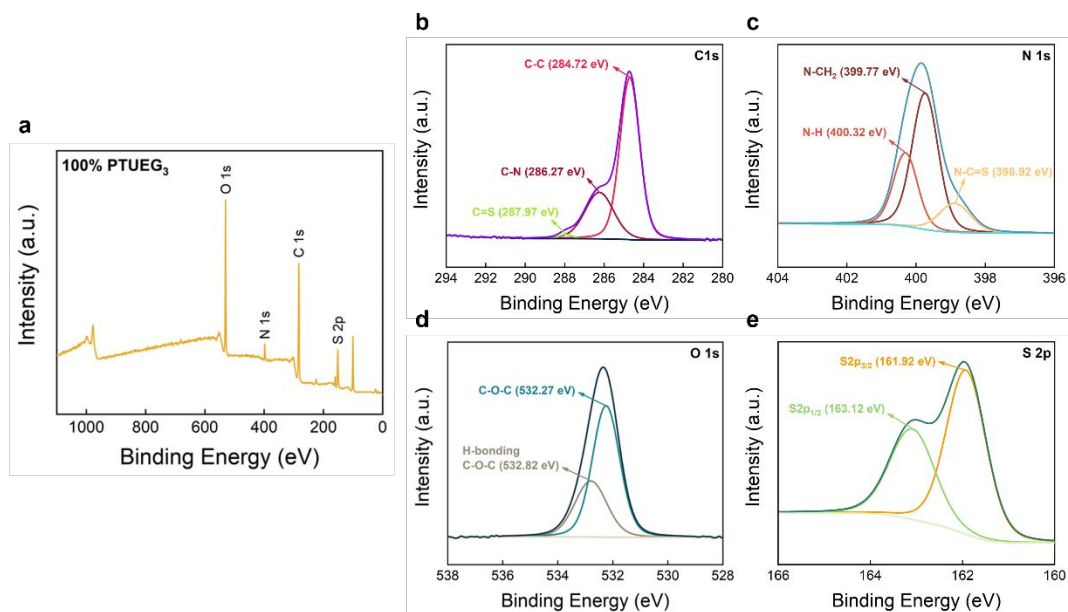

**Figure S15.** XPS spectra of the elemental compositions in the TPU/PTUEG<sub>3</sub> fabrics with a 0:100 weight ratio. (a) Full survey spectrum. (b–e) C1s, N1s, O1s, and S2p spectra.

**Table S2.** Mechanical properties of the TPU/PTUEG<sub>3</sub> fabrics

| Healing Time (h) | PTUEG <sub>3</sub> Ratio (%) | Tensile Strength (MPa) | Elongation at Break (%) | Young's modulus (MPa) | Toughness (MJ/m <sup>3</sup> ) |
|------------------|------------------------------|------------------------|-------------------------|-----------------------|--------------------------------|
| Pristine         | 50                           | 8.2                    | 179.8                   | 0.029                 | 816.7                          |
|                  | 70                           | 9.4                    | 141.9                   | 0.026                 | 646.3                          |
| 1                | 50                           | 6.3                    | 137.5                   | 0.040                 | 503.6                          |
|                  | 70                           | 3.5                    | 60.3                    | 0.037                 | 87.4                           |
| 3                | 50                           | 7.1                    | 139.2                   | 0.036                 | 549.4                          |
|                  | 70                           | 9.1                    | 161.7                   | 0.028                 | 715.2                          |
| 5                | 50                           | 7.5                    | 145.8                   | 0.034                 | 582.7                          |
|                  | 70                           | 9.3                    | 161.2                   | 0.027                 | 723.3                          |
